# Supplementary material
Source: PubMed Central journal article supplement (PMC4750881)

# suppl. Figure 1

**A**

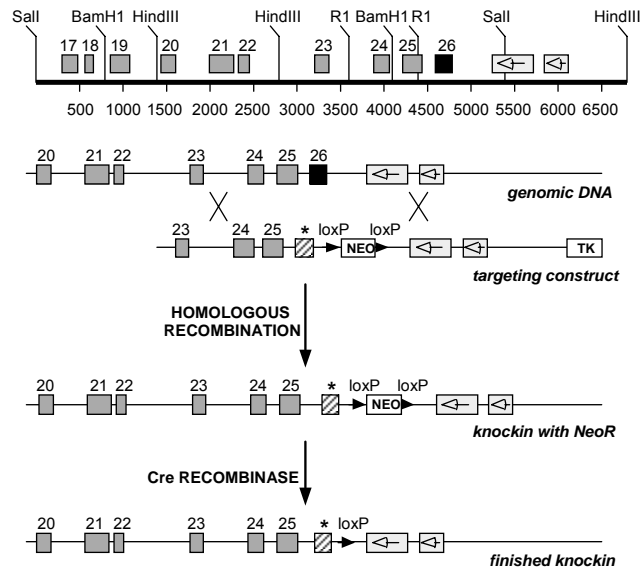

**B**

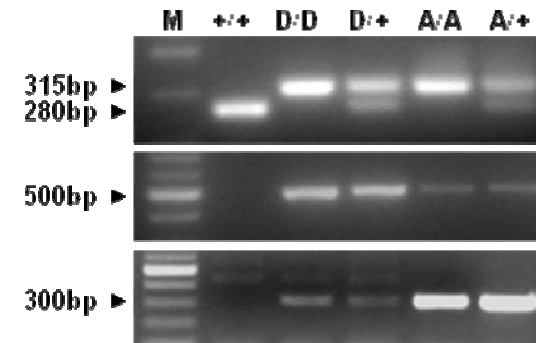

**C**

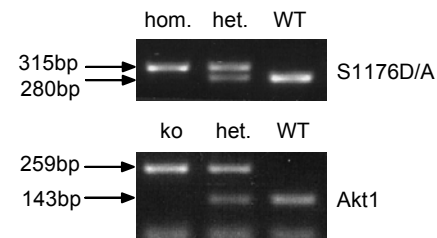

# suppl. Figure 2

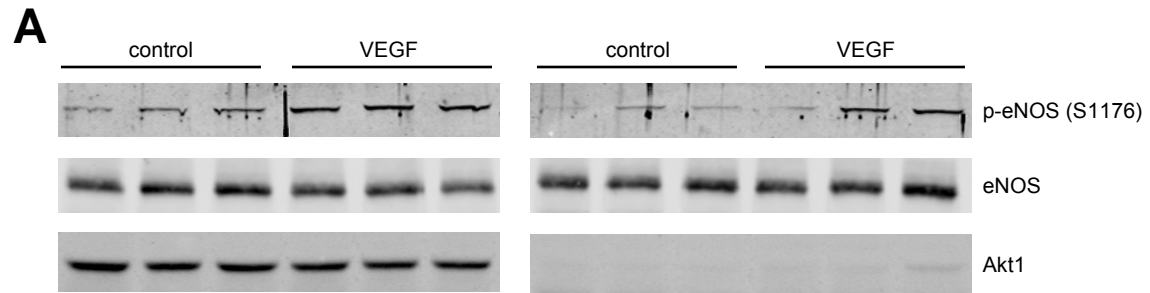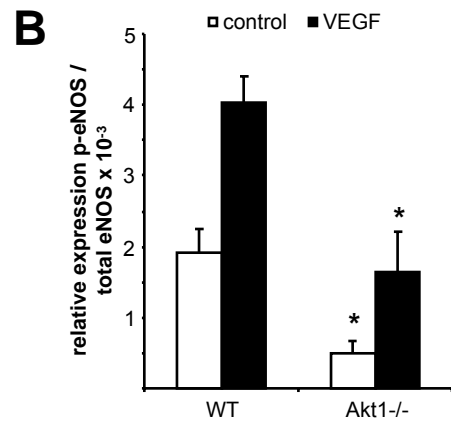

# suppl. Figure 3

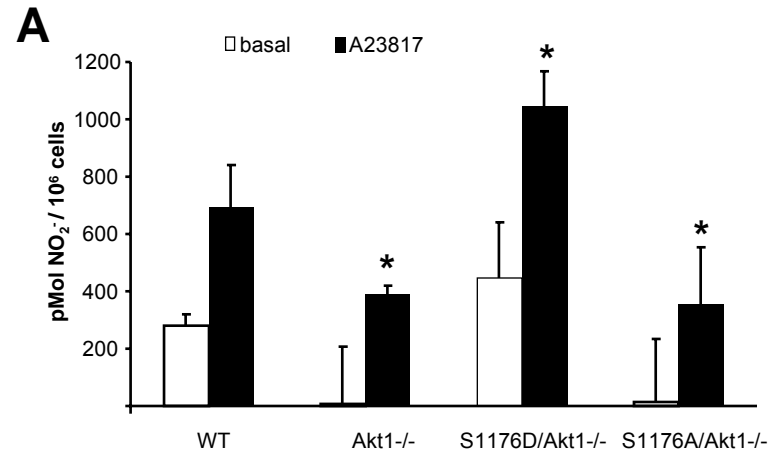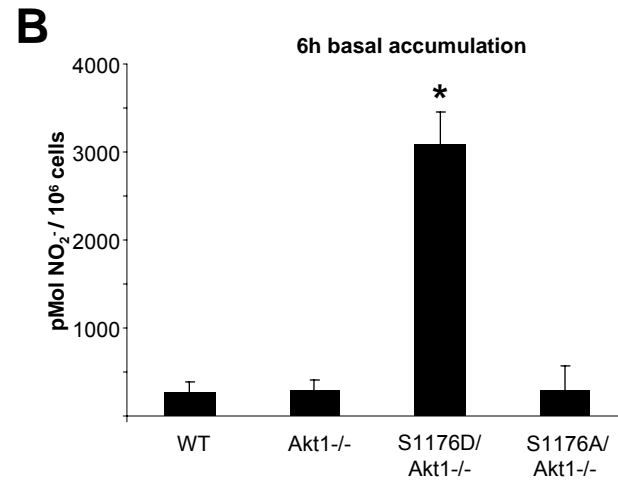

# suppl. Figure 4

## A

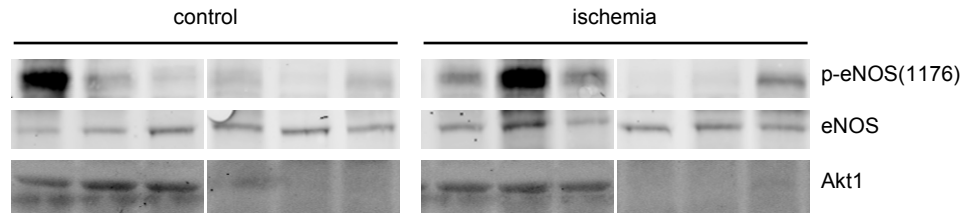

## B

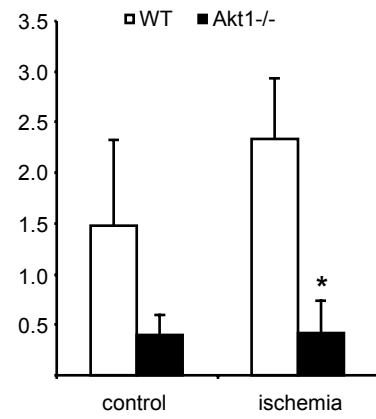

suppl. Figure 5

**A**

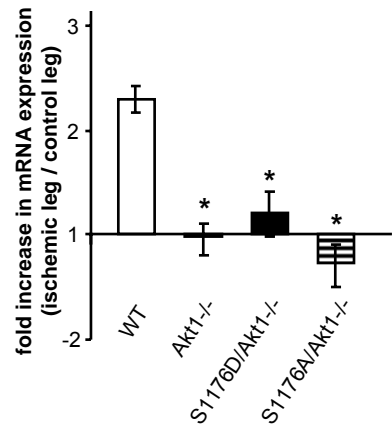

**B**

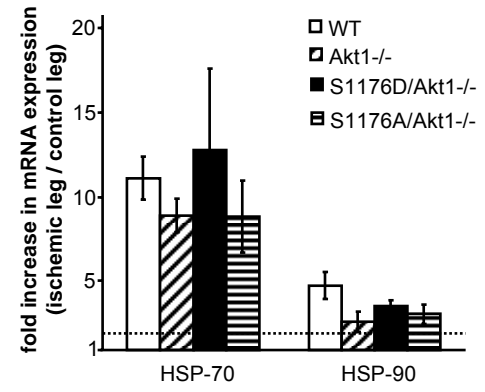

# suppl. Figure 6

## A

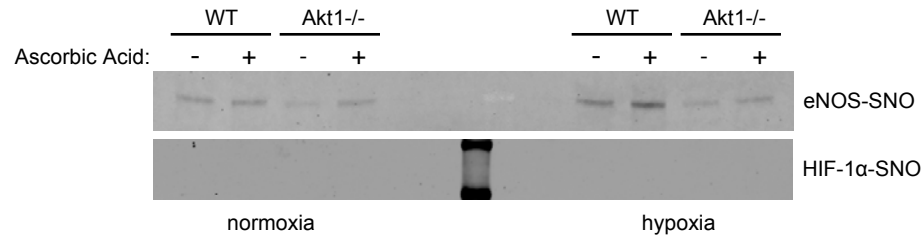

## B

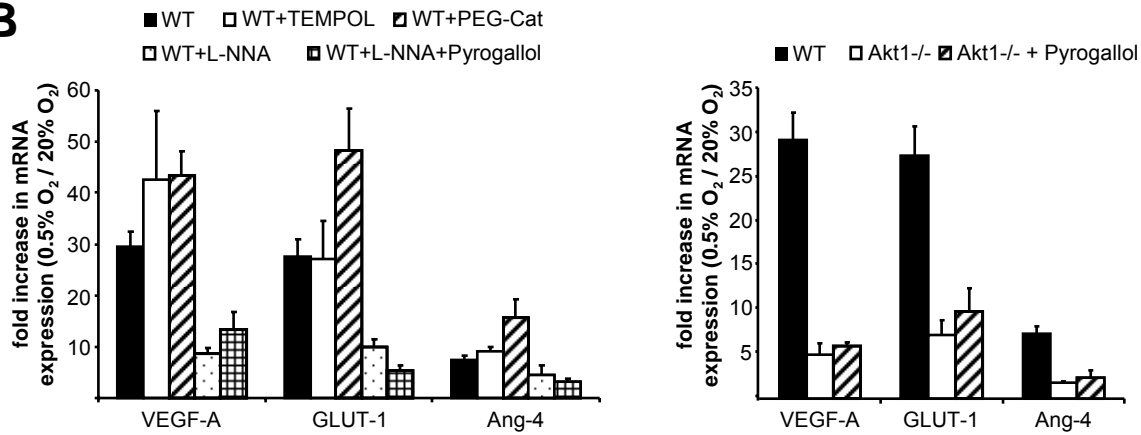

## C

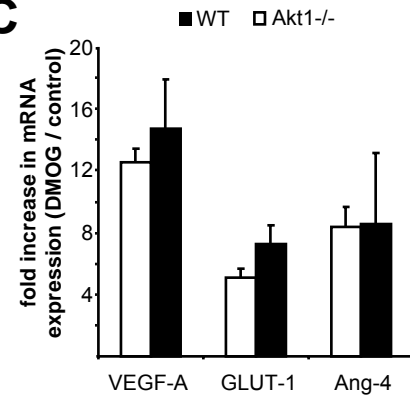

Supplement: NIHMS752391-supplement-Supplement.pdf [file NIHMS752391-supplement-Supplement.pdf]
